# Supplementary material
Source: PubMed Central journal article supplement (PMC11327955)

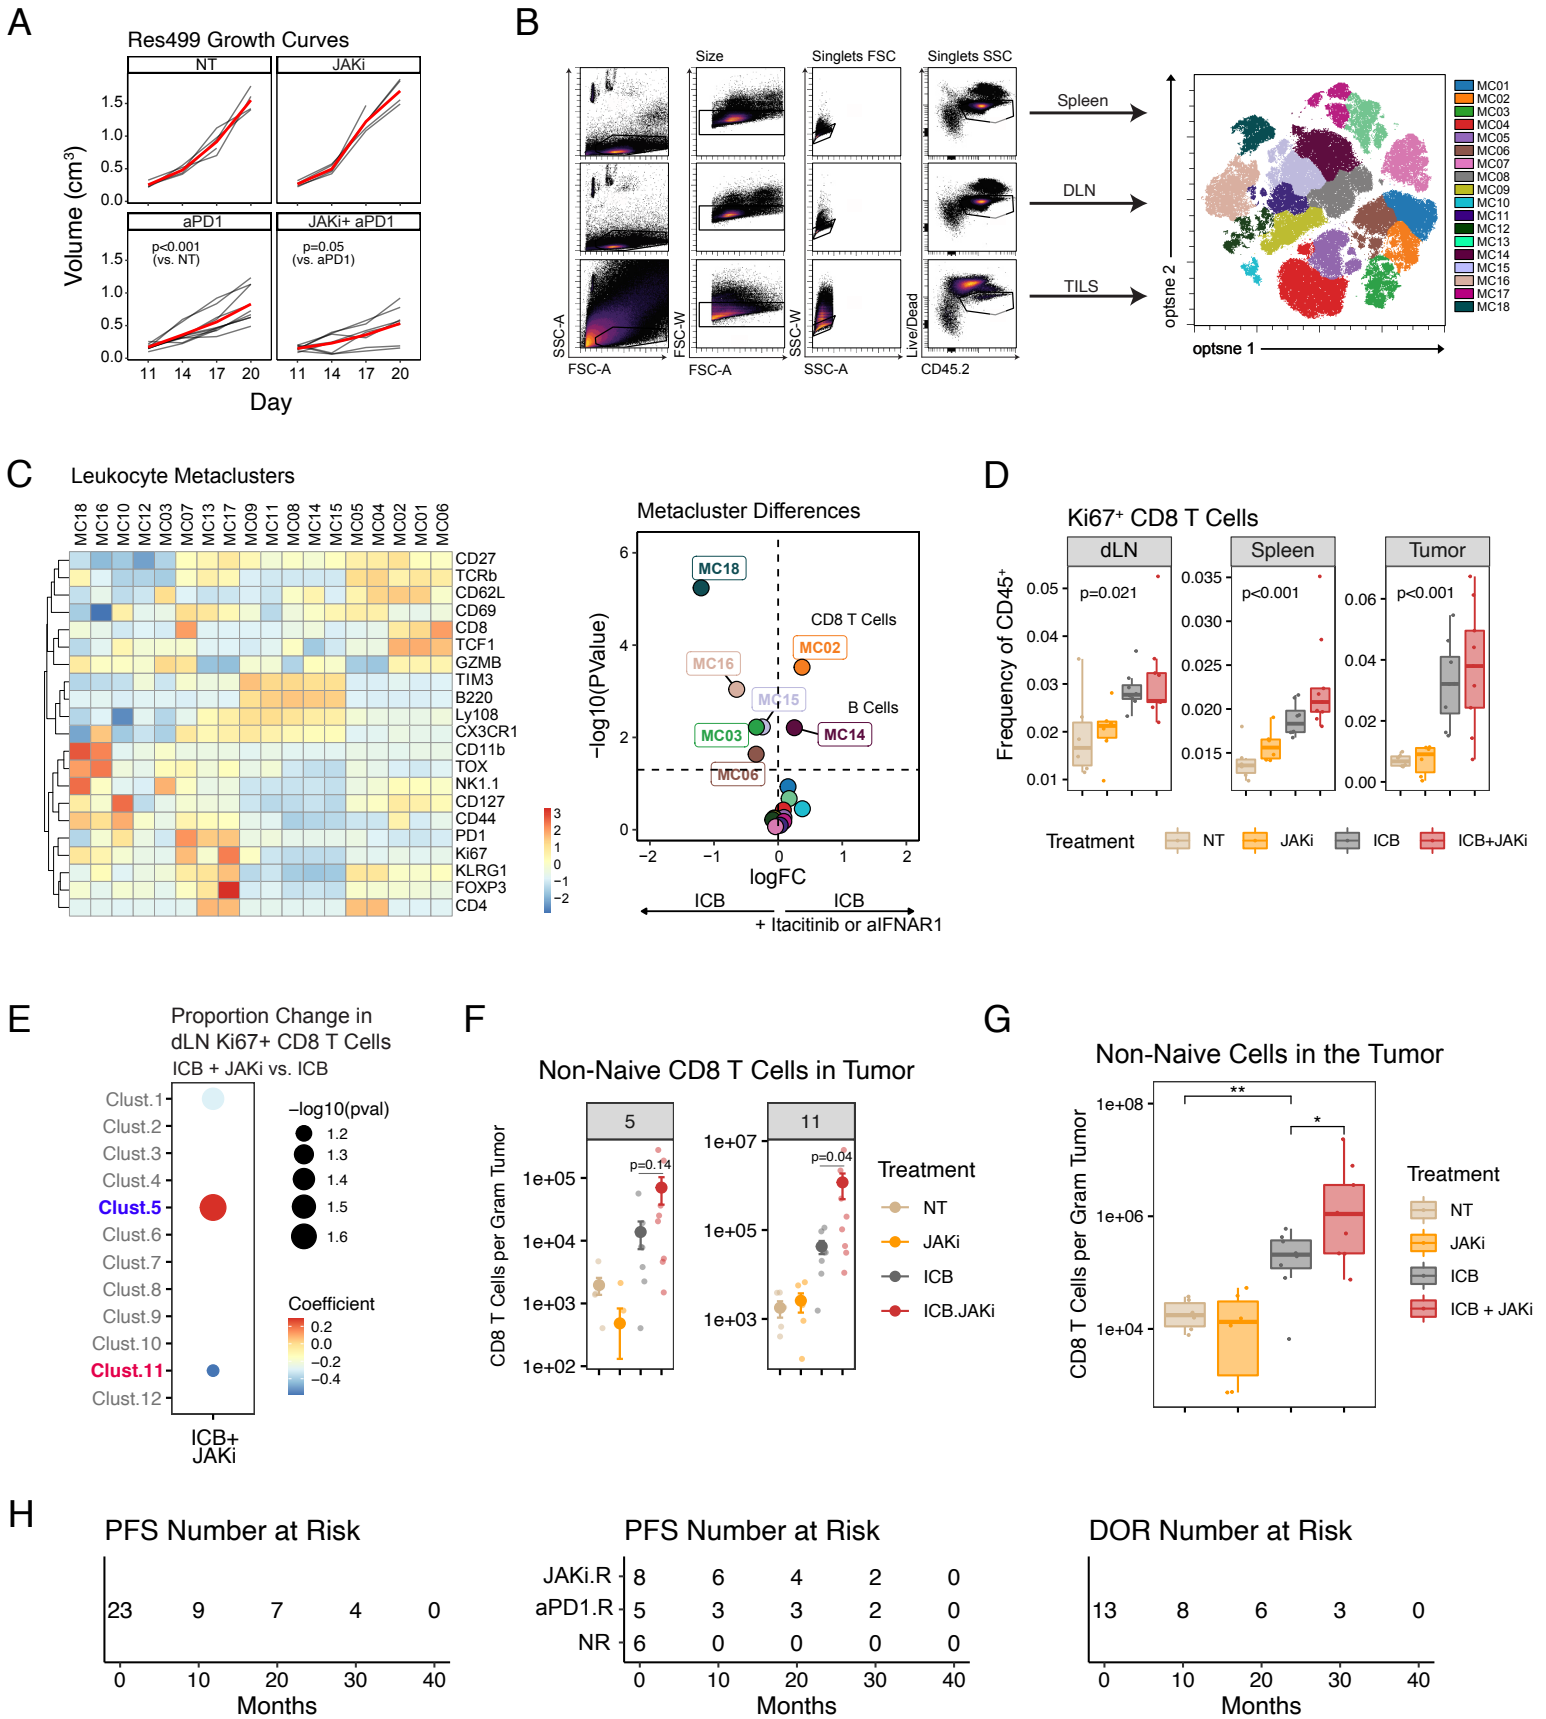

A

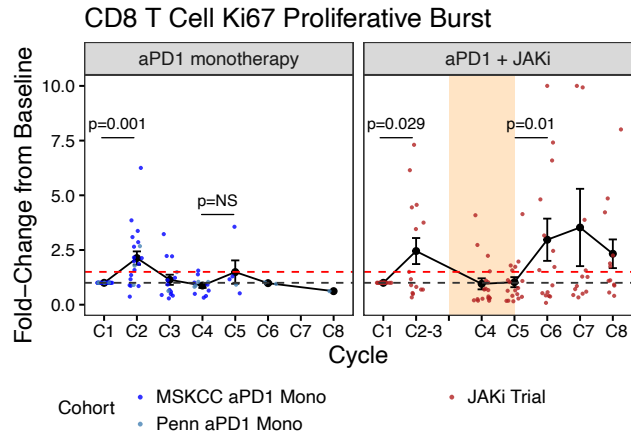

B

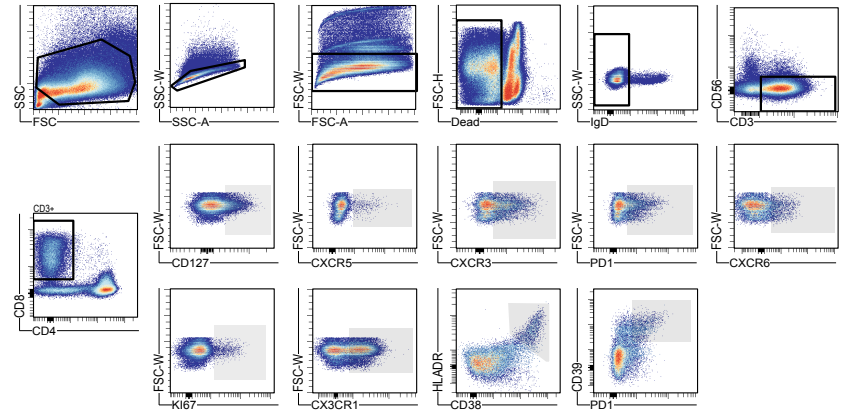

C

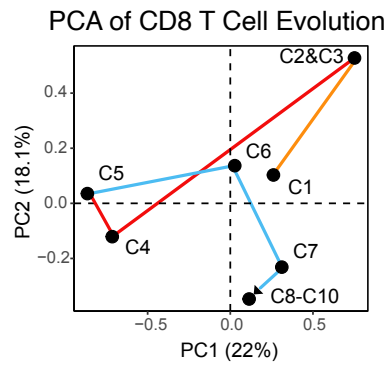

E

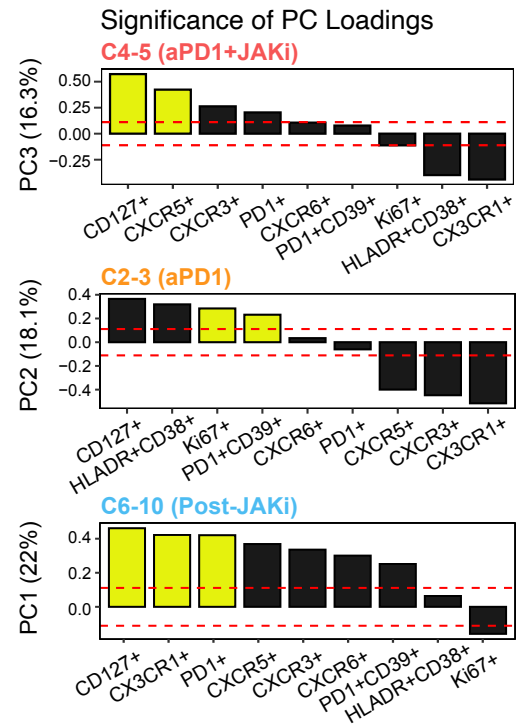

D

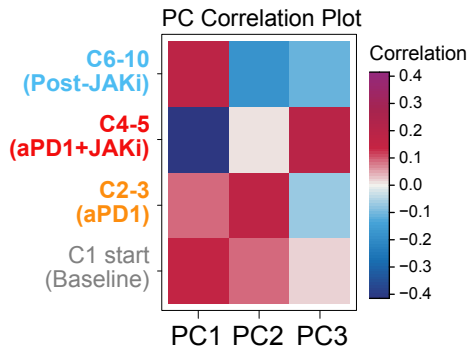

F

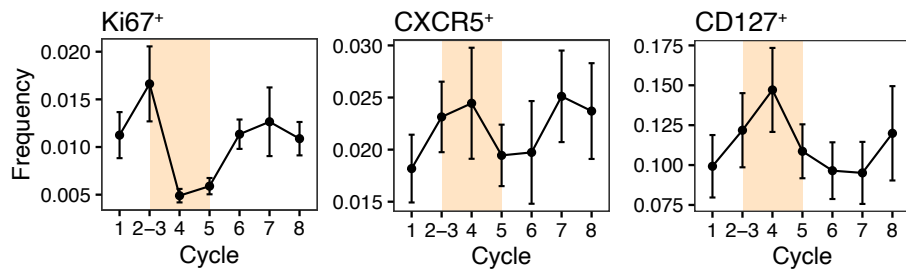

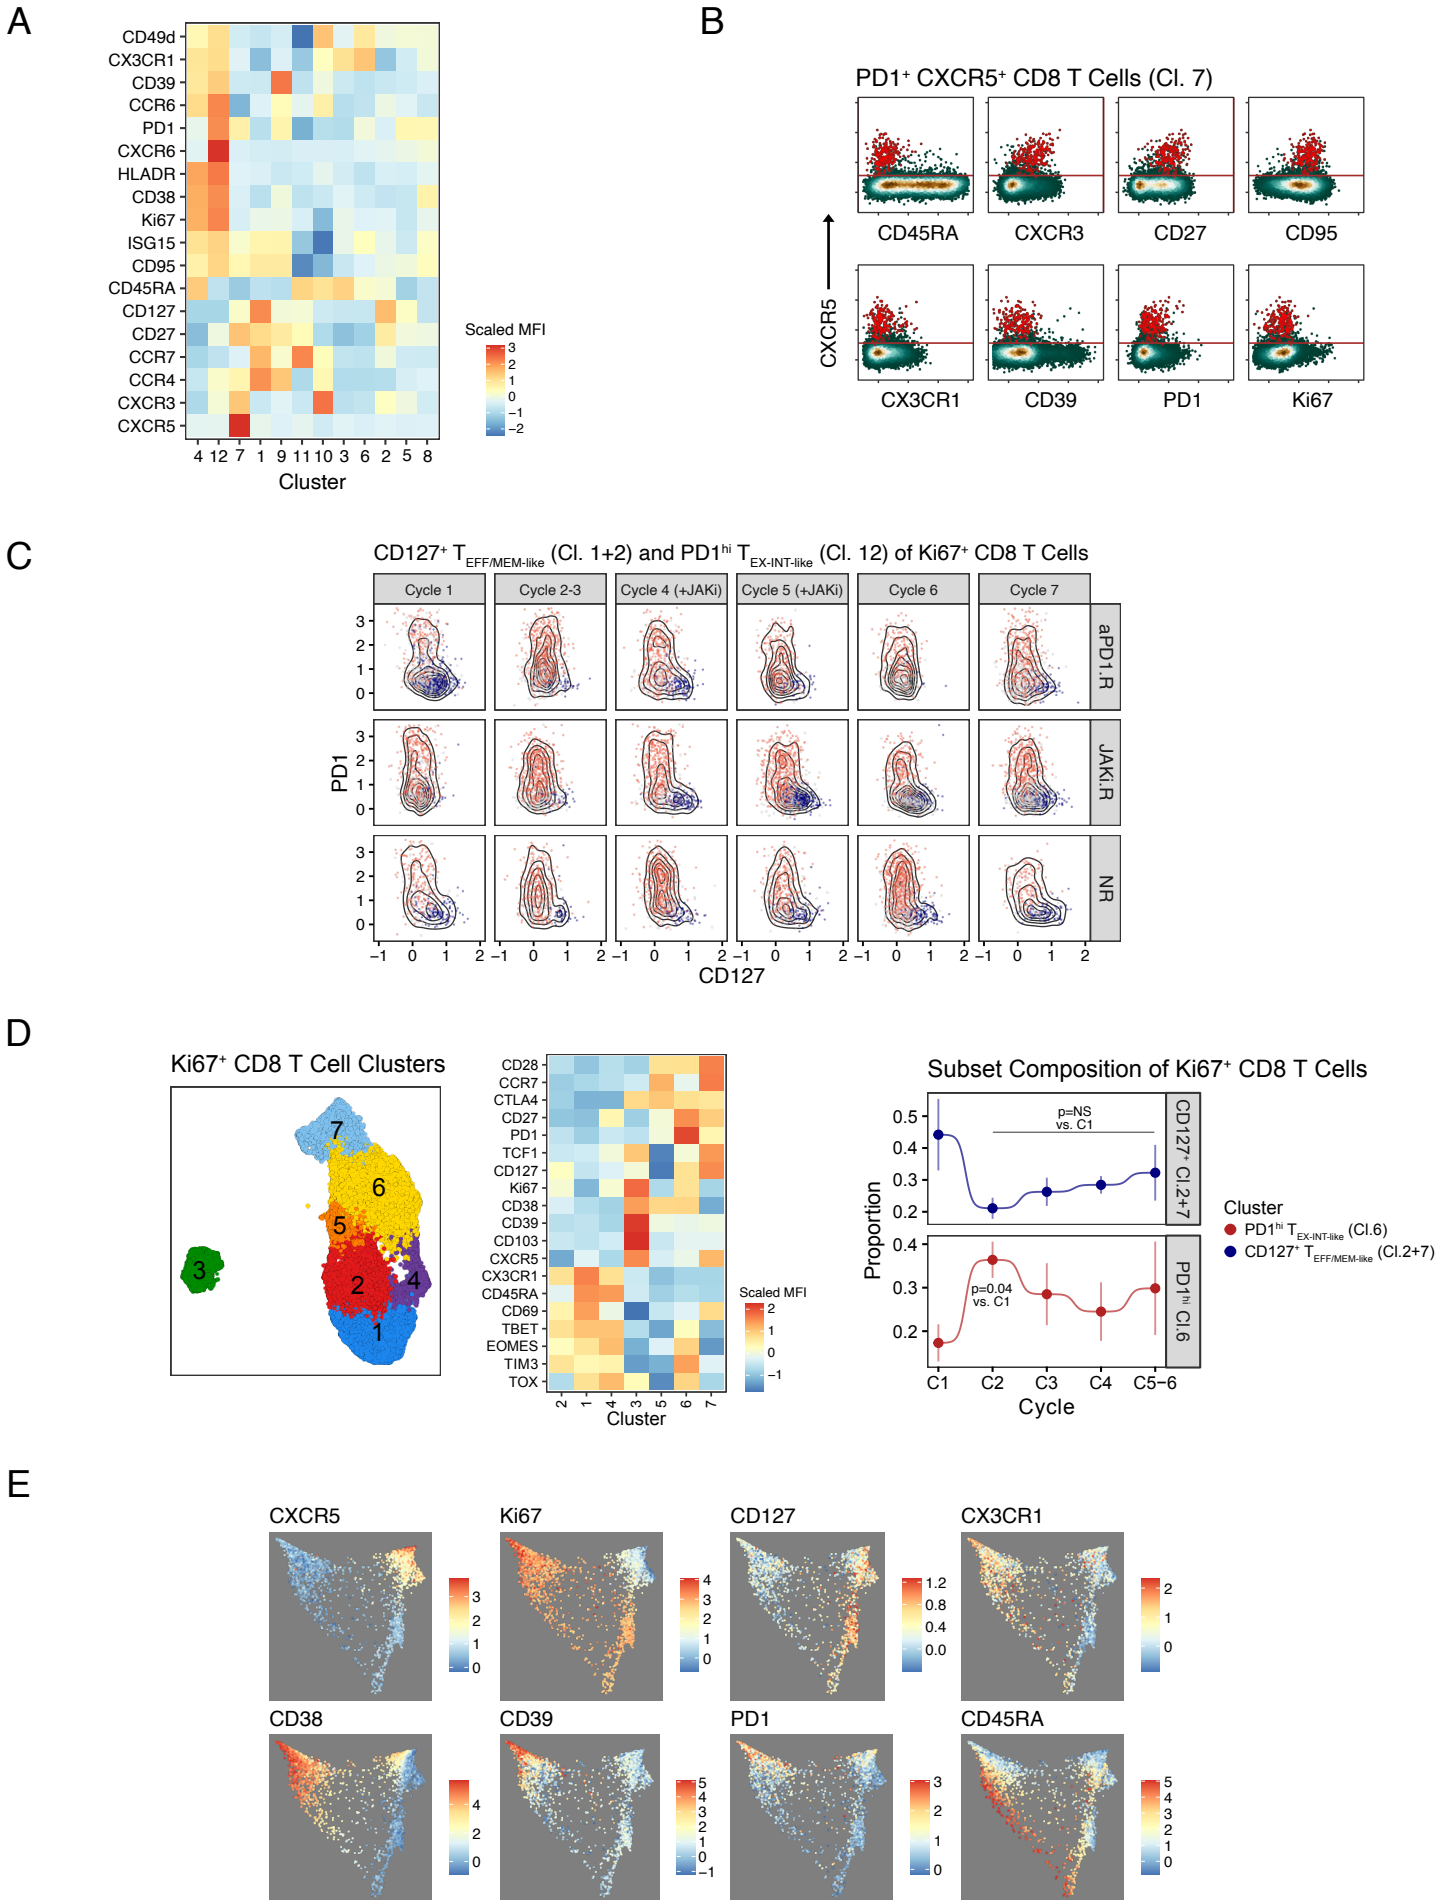

A

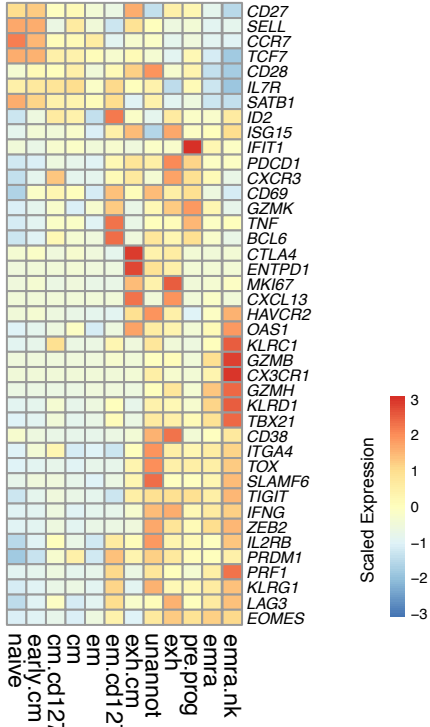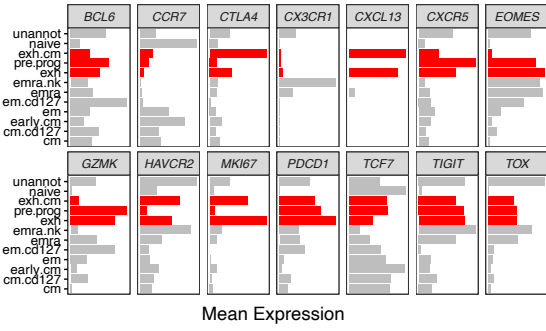

B

CD8 T Cell Annotation Scores

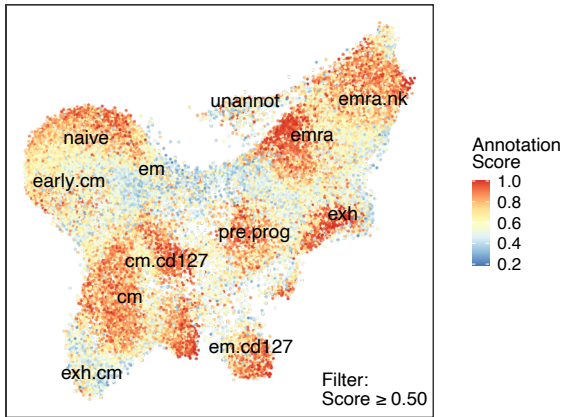

C

CXCR5 and TCF7 in Peripheral CD8 T Cells (Zhang Atlas)

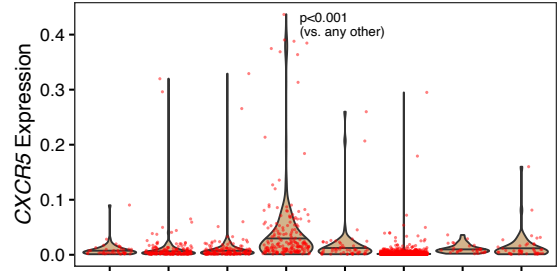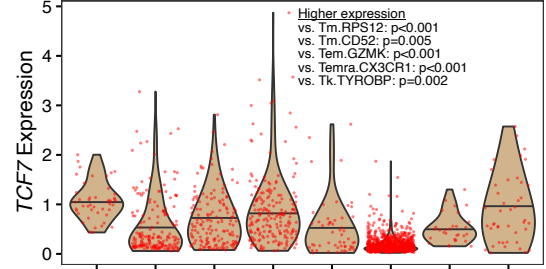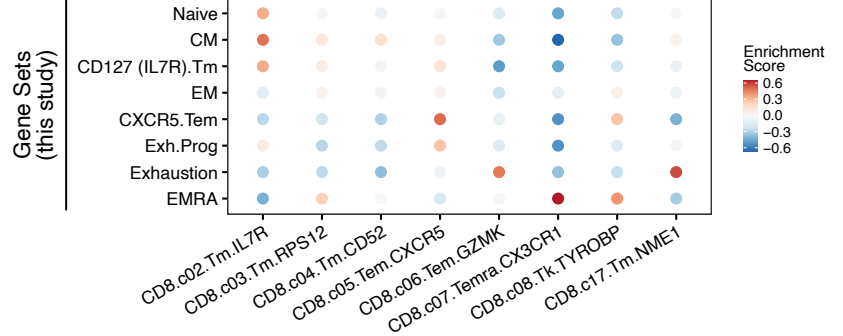

CD8 T Cells in the Peripheral Blood (Zheng et al., Science 2021)

D

CD8 T Cells in PBMCs

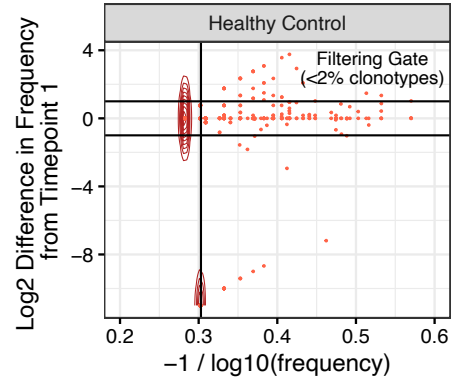

A

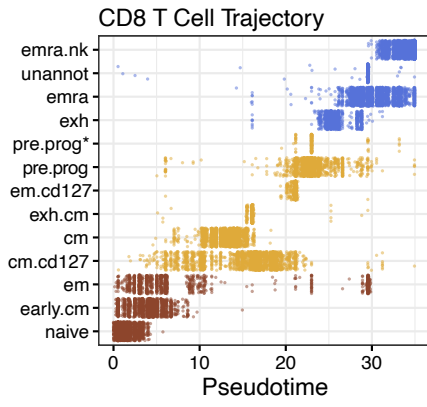

B

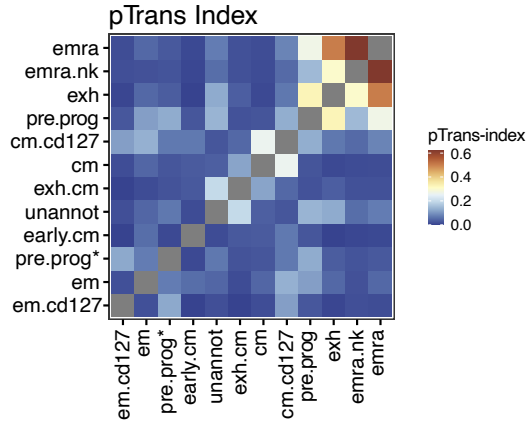

C

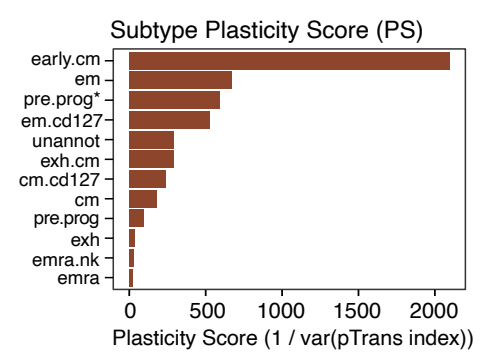

D

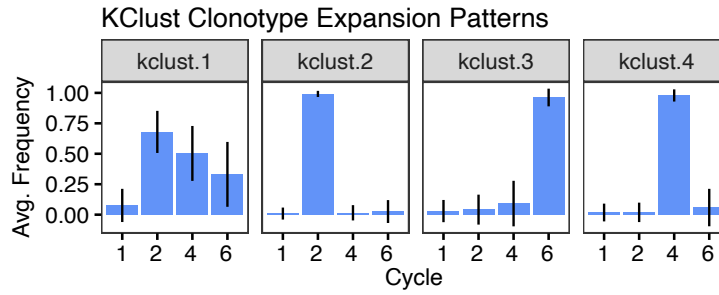

E

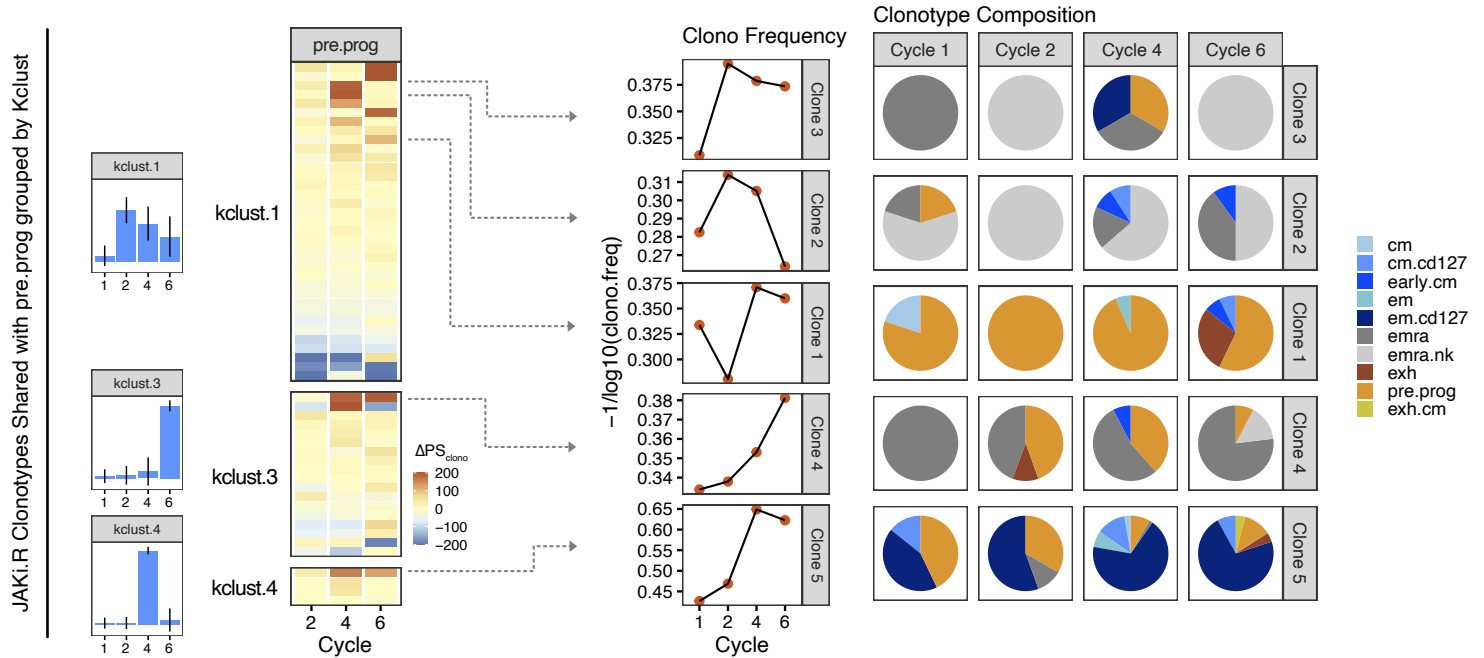

Tumor and Blood Shared Clonotypes from JAKi.R Patient

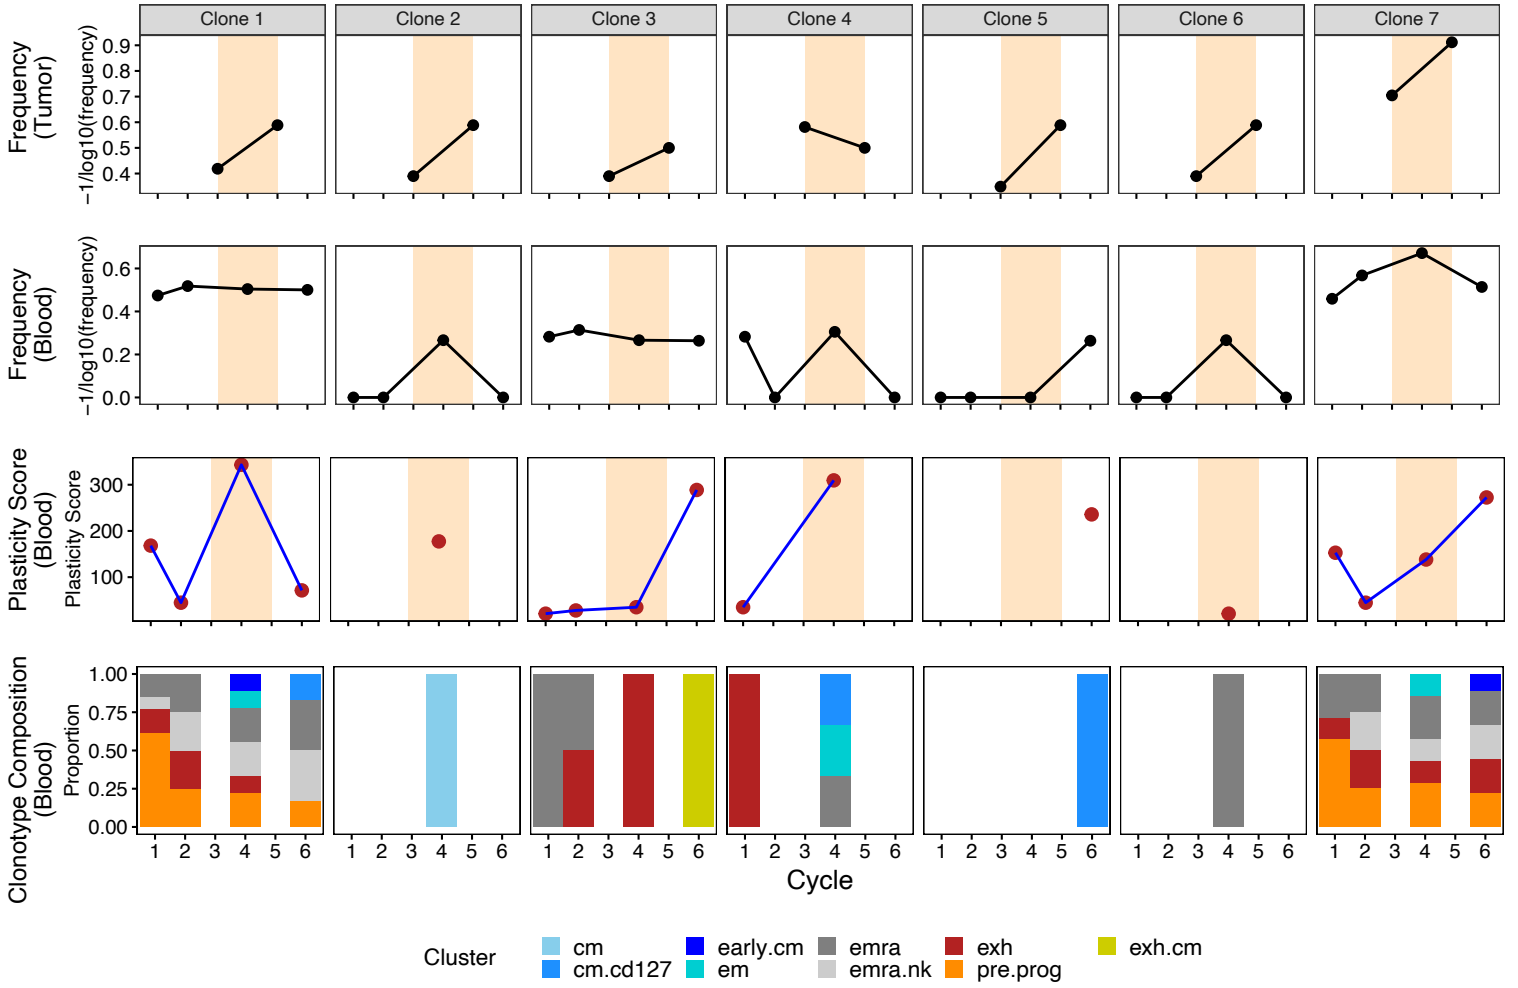



A

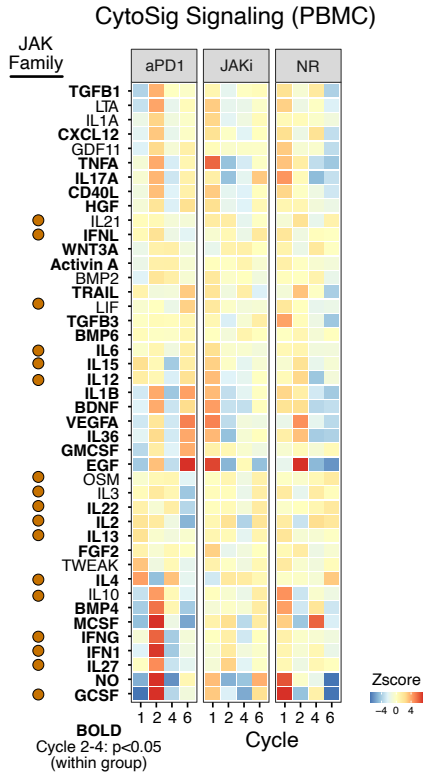

B

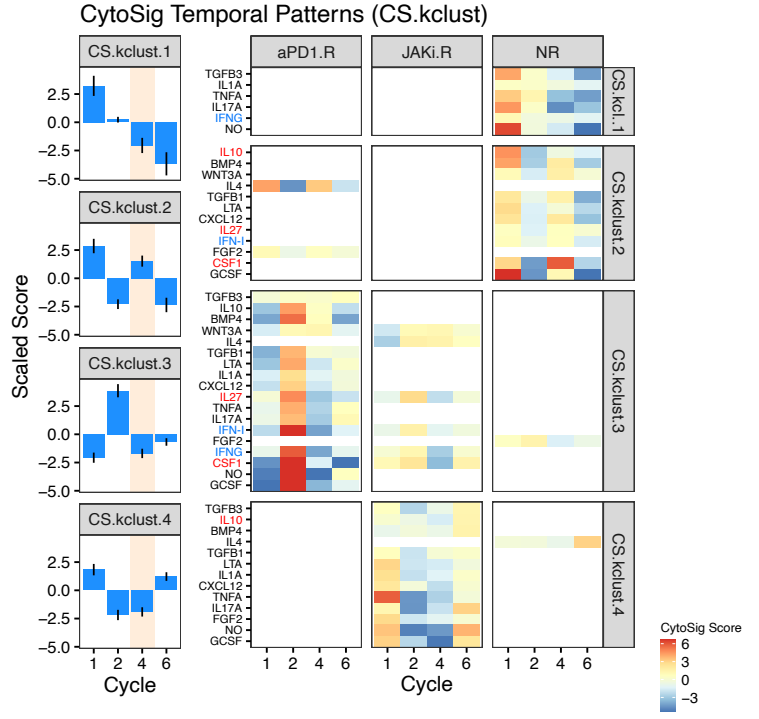



A

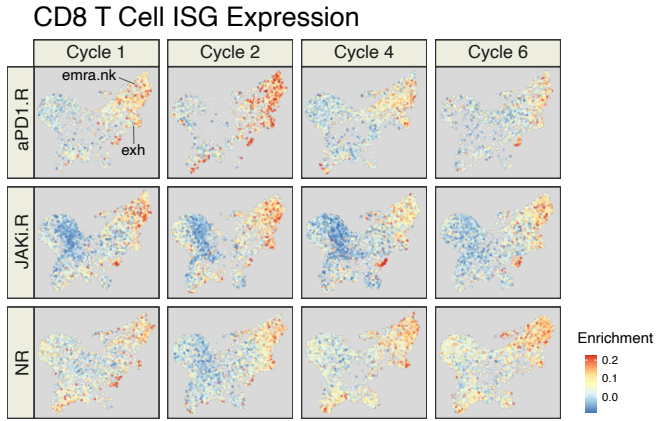

B

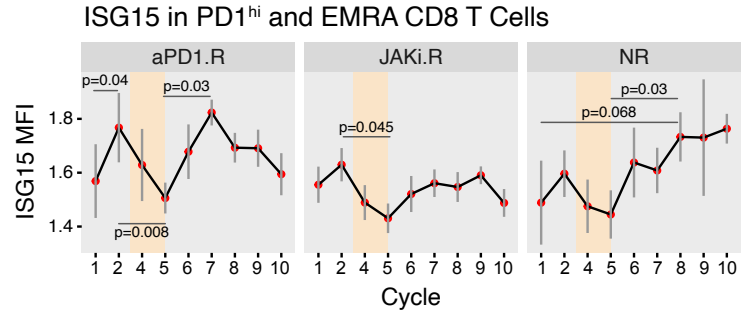

C

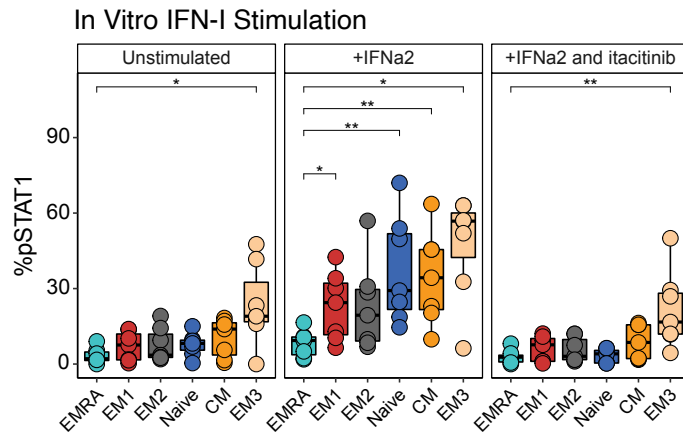

Supplement: NIHMS2006772-supplement-Supplemental_Figures.pdf [file NIHMS2006772-supplement-Supplemental_Figures.pdf]
